# Supplementary material for: Wound Fluid from Breast Cancer Patients Undergoing Intraoperative Radiotherapy Exhibits an Altered Cytokine Profile and Impairs Mesenchymal Stromal Cell Function
Source: MDPI journal article supplement (doi:10.3390/cancers13092140), 2021-04-29
Supplement: s1 [file s1]

# Wound Fluid from Breast Cancer Patients Undergoing Intraoperative Radiotherapy Exhibits an Altered Cytokine Profile and Impairs Mesenchymal Stromal Cell Function

Anne Wuhrer, Stefanie Uhlig, Benjamin Tuschy, Sebastian Berlit, Elena Sperk, Karen Bieback and Marc Sütterlin

**Table S1:** Reagents used for immunophenotyping.

| Name / Antigen               | Clone      | Fluorochrome | Manufacturer     |
|------------------------------|------------|--------------|------------------|
| <b>Myeloid panel</b>         |            |              |                  |
| CD15 (neutrophils)           | HI98       | FITC         | Becton Dickinson |
| CD16 (NK cells, phagocytes)  | 3G8        | APC-Cy7      | Becton Dickinson |
| CD45 (leucocytes)            | HI30       | PE-Cy7       | Becton Dickinson |
| CD14 (mainly monocytes)      | MφP9       | PerCP-Cy5.5  | Becton Dickinson |
| CD64 (mature myeloid cells)  | 10.1       | PE           | Becton Dickinson |
| CD56 (NK cells)              | NCAM16.2   | APC          | Becton Dickinson |
| TruCOUNT™ tubes              |            |              | Becton Dickinson |
| FcR Blocking Reagent         |            |              | Miltenyi Biotec  |
| <b>Lymphoid panel</b>        |            |              |                  |
| CD3 (t cells)                | UCHT1      | APC/Cy7      | BioLegend        |
| CD4 (t helper cells)         | RPA-T4     | PE           | Becton Dickinson |
| CD8 (cytotoxic t cells)      | RPA-T8     | FITC         | Becton Dickinson |
| CD45 (leucocytes)            | HI30       | PE-Cy7       | Becton Dickinson |
| CD69 (early activation)      | FN50       | PerCP        | BioLegend        |
| CD154 (activation)           | TRAP1      | APC          | Becton Dickinson |
| TruCOUNT™ tubes              |            |              | Becton Dickinson |
| FcR Blocking Reagent         |            |              | Miltenyi Biotec  |
| <b>Treg panel</b>            |            |              |                  |
| CD4                          | RPA-T4     | FITC         | Becton Dickinson |
| CD25                         | M-A251     | APC          | Becton Dickinson |
| CD127                        | HIL-7R-M21 | PE-Cy7       | Becton Dickinson |
| CD196                        | 11A9       | PerCP-Cy5.5  | Becton Dickinson |
| FoxP3                        | 259D/C7    | PE           | Becton Dickinson |
| <b>Annexin V/PI staining</b> |            |              |                  |
| CD45                         | HI30       | PE-Cy7       | Becton Dickinson |
| Annexin V-APC                |            |              | Becton Dickinson |
| Annexin V-pure               |            |              | Becton Dickinson |
| FcR Blocking Reagent         |            |              | Miltenyi Biotec  |

**Table S2.** Rating strategies for the immunophenotyping of the myeloid, lymphoid and Treg panel.

### Myeloid panel

Monocytes: CD45+ → CD14+  
Neutrophils: CD45+ → CD15+, CD16+  
NK cells: FSC/SSC (lymphocytes, morphological) → CD45+, CD64+  
                  subtyping: CD56 vs. CD16  
Mature myeloid cells: CD45+ → CD64+

## Lymphoid panel

T cells: CD45+ → CD3+  
 T helper cells: CD45+ → CD3+ → CD4+  
 Cytotoxic T cells: CD45+ → CD3+ → CD8+

## Activation markers

early: CD45+ → CD3+ → CD69+  
late: CD45+ → CD3+ → CD154+

Treg panel

FSC/SSC (lymphocytes, morphological) → CD4, CD25  
→ CD127, FoxP3  
→ CD196

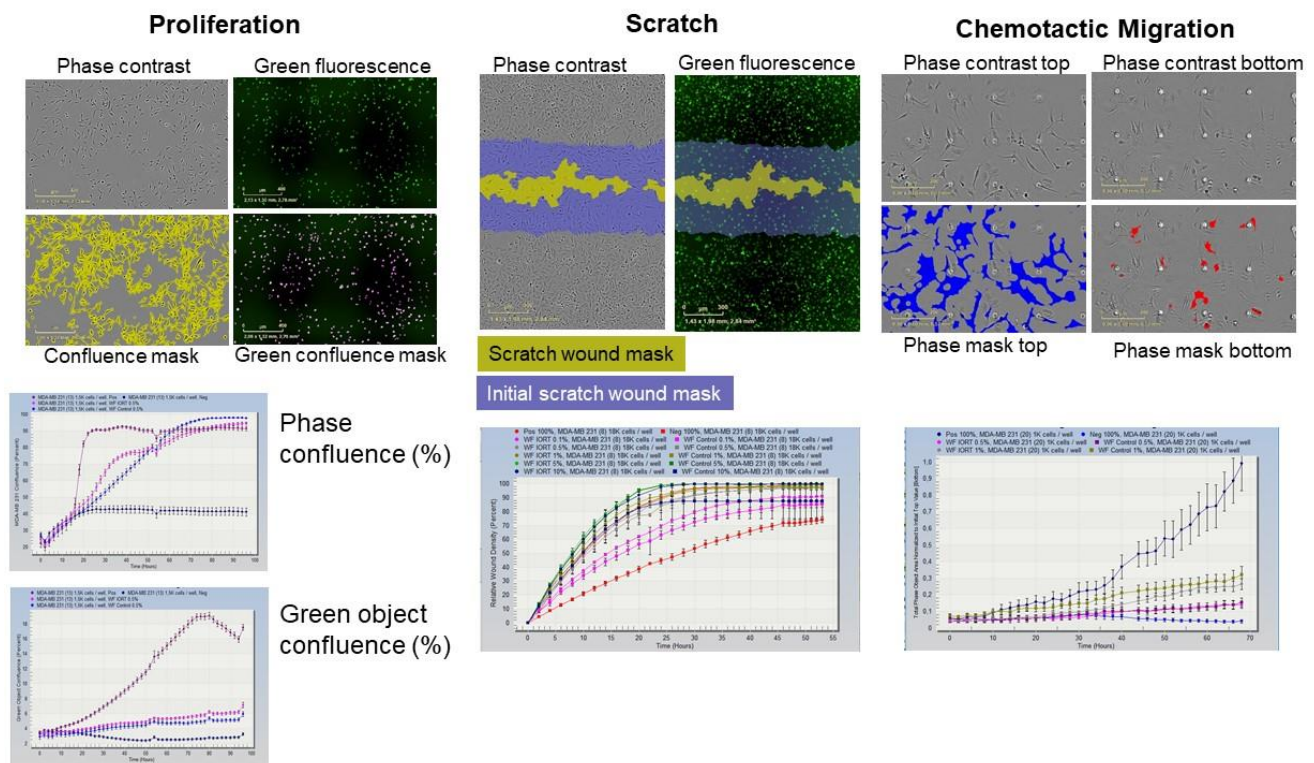

**Figure S1.** Captures and analysis masks monitored during MDA-MB 231 experiments with IncuCyte ZOOM® that allow the comparison of phase contrast and nuclear GFP confluence. Cell proliferation was quantified as percent confluence using either nuclear GFP values (proliferation) or phase contrast values (scratch wound healing and chemotactic migration).
